# Supplementary material
Source: publisher figshare collection journal article supplement (https://rs.figshare.com/ndownloader/files/8724694)
Supplement: Supplementary file 1 [file 8724694]

**Supplementary material**

**Using Captain Scott’s Discovery specimens to unlock the past: Has Antarctic cyanobacterial diversity changed over the last 100 years?**

Anne D. Jungblut, Ian Hawes

Supplementary material and methods

*Study sites and samples*

Cyanobacterial mat samples were studied from the Ross Island and McMurdo Ice Shelf in Southern Victoria Land Antarctica. Six samples were from the McMurdo Ice Shelf and one from close to winter quarters on Ross Island near Hut Point, currently the location of the historic Discovery Hut and the current US Antarctic McMurdo Station (Supplementary Table S1). McMurdo Ice Shelf samples were from an area approximately half way between Brown and Black Peninsulas (1). One sample was collected by Dr Wilson and the other likely by Dr Koettlitz (1, 2). The dried, still green-pigmented cyanobacterial mat samples (Figure 1) are held in the Natural History Museum Botanical collections, London, UK. The mm to cm thick dried cyanobacterial mats were found preserved dry on paper herbarium sheets, in the dark, at room temperature. No records are available how the specimens were dried and kept during the first half of the century. However, based on expedition records (2), herbarium specimens were likely prepared by drying and pressing of material in the field directly after collection, by Dr R. Koettlitz.

The Scott’s Discovery samples were compared with present-day cyanobacteria from microbial mats collected from freshwater meltwater ponds on the McMurdo Ice Self, Cape Royds and Cape Evans on Ross Island in January 2011, and Hut Point, Ross Island near the Discovery Hut in January 2012 (Supplementary Figure S1 and Table S2). Samples from the McMurdo Ice Shelf were from near Bratina Island and half way between Brown Peninsula and Black Island. Sample sites were chosen to be the same geographic regions as described from the Discovery Expedition and listed as sample locations in the Terra Nova and Nimrod expedition, as well as to cover a range of water chemistries (Supplementary Table S2). Modern samples were collected in sterile plastic containers and frozen within 24h. Frozen samples were transported to the NHM and stored at -80°C until further use.

*PCR, PCR-product purification, and pyrosequencing*

Cyanobacterial 16S rRNA genes were amplified using Platinum High Fidelity Taq Polymerase (Invitrogen) in triplicate using cyanobacterial specific primers 16S378F (5' GGGGAATYTTCCGCAATGGG T ‘3) and 16S781R (5'GAC TAC WGG GGT ATC TAA TCC C W T T ‘3) modified from Taton et al (18) containing the linker A (Primer A: 5' – CGT ATC GCC TCC CTC GCG CCA TCAG-MID– template specific sequence – 3') and B (Primer B: 5' – CTA TGC GCC TTG CCA GCC CGC TCAGC – template specific sequence – 3') using the recommended Roche barcodes (MID1-8). These primers provide a broad coverage across the phylum cyanobacteria (3). Barcodes were designed to be on Primer A followed by the 16S781R. PCR-products were pooled per sample and purified using Qiagen gel-purification (Qiagen, Hilden, Germany) according to the manufacturer’s instructions, and quantified in duplicate by Qubit. Eight samples were multiplexed per Junior 454-pyrosequencing run (Roche) to generate approximately 450 bp long reads and was performed at the Biochemistry DNA Sequencing Facility, Department of Biochemistry, University of Cambridge, UK. We used cyanobacteria-specific protocols that allowed us to exclude any other bacteria and microbial eukaryote contaminants from the century-long storage at the Natural History Museum.

*Sequencing and statistical analysis*

Sequences from the three runs were combined and operational taxonomic units (OTUs) generated using the standard operation protocol for 454 data sequencing by Qiime (4) Sequences were clustered in OTUs based on 99% sequence similarity using uclust for highest taxonomic resolution. OTUs were then classified to identify taxonomic annotation using the Greengenes taxonomic database (5), and chimeras removed using Chimera Slayer. Subsequently, sequences of unassigned, eukaryotic origin, non-cyanobacterial bacteria taxa, and Cyanobacteria sequences with assignment to only phyla level (“Cyanobacteria” phyla level) were removed from further analysis. The remaining OTUs were at least assigned to class level (Synechococcophycideae, Oscillatoriophycideae, Nostocophycideae, Gloeobacterphycideae). OTUs with abundance of less than 0.01% were filtered and removed from further analysis and samples were subsequently rarefied using 1267 sequences.

Phylogenetic analysis was performed with a representative sequence for each genotype (99% clustered) that was either one of the most abundant genotypes, or only present either in the old or new samples. In addition, at least one of the closest cultured and uncultured match based using a BLASTn search (5 March 2017, 6) to GenBank was included in the analysis. For comparison, a range of cultured and environmental cyanobacterial sequences were also included from the Antarctic, Arctic and other climate zones. Sequences were aligned using Clustal X (version 2.0.9) and manual edited with Mesquite (3.04). Raw sequences are available at the National Centre for Biotechnology Information Sequence Read Archive under the accession number PRJNA323585.

References

1. Fritsch FE. 1912 Freshwater algae. In National Antarctic Expedition 1901-04, Natural History Report, Zoology and Botany (ed. FJ Bell), pp. 1–60. London, UK: British Museum (Natural History).

2. Scott RF. 1907 The South Polar Times. London, UK: Smith, Elder and Co.

3. Taton A, Grubisic S, Brambilla E, de Wit R, Wilmotte A. 2003 Cyanobacterial diversity in natural and artificial microbial mats of Lake Fryxell (McMurdo Dry Valleys, Antarctica): a morphological and molecular approach. Appl. Environ. Microbiol. 69, 5157–5169. (doi:10.1128/AEM.69.9.5157-5169. 2003)

Caporaso JG et al. 2010 QIIME allows analysis of high-throughput community sequencing data. Nat.Methods **7**, 335–336. (doi:10.1128/AEM.69.9.5157-5169.2003)

5. McDonald D, Price MN, Goodrich J, Nawrocki EP, DeSantis TZ, Probst A. 2012 An improved Greengenes taxonomy with explicit ranks for ecological and evolutionary analyses of bacteria and archaea. ISME J. **6**, 610–618. (doi:10.1038/ismej. 2011.139)

6. Altschul SF, Gish W, Miller W, Myers EW, Lipman DJ. 1990 Basic local alignment search tool. J. Mol. Biol. **215**, 403–410. (doi:10.1016/S0022- 2836(05)80360-2)

**Table S1.** Location, description, date and accession numbers of cyanobacteria-based microbial mat samples collected during Captain Scott’s Discovery expedition to Antarctica’ * Ponds half-way between Black Island and Brown Peninsula as reported by Fritsch (*1*).

| **Sample name** | **Descriptions accompanying herbarium specimens** | **Location** | **Date** | **Catalogues number** | **Number of OTUs** | **Chao1 richness** |
| --- | --- | --- | --- | --- | --- | --- |
| SCT1 | Portion of enormous freshwater algae found growing in through ice in pond among the eskers which border the shore of West Mainland* | McMurdo Ice Shelf | 2 Dec. 1902 | BM001062584 | 85 | 108.9 |
| SCT 2 | Fragment of large algae (freshwater) west eskers* | McMurdo Ice Shelf | 2 Dec. 1902 | BM001062585 | 111 | 167.4 |
| SCT 3 | Portion of enormous fresh water fungus found penetrating ice (by thaw) in pond anchoring esker of West mainland shore* | McMurdo Ice Shelf | 2 Dec. 1902 | BM001062586 | 105 | 153.2 |
| SCT 4 | Portion of enormous fresh water* | McMurdo Ice Shelf | 2 Dec. 1902 | BM001062587 | 84 | 107.9 |
| SCT 5 | Dried fragment of alga driven by wind upon lea-shore of freshwater pond on islet in "old ice" McMurdo strait, collected by S Wilson* | McMurdo Ice Shelf | Dec. 1903 | BM001062588 | 93 | 147.7 |
| SCT 6 | From dry pond winter quarter | Ross Island | Feb. 1902 | BM001062589 | 100 | 147.7 |
| SCT 7 | Esker Pond, Shore Western land* | McMurdo Ice Shelf | 14 Dec. 1902 | BM001062590 | 54 | 64.5 |

**Table S2.**

Location, date of collection, latitude-longitude and properties of cyanobacteria-base microbial mats and properties such as conductivity, temperature and pH. Legend: *unofficial names

| **Sample name** | **Site*** | **Location** | **Latitude**  **longitude** | **Date** | **Conductivity**  **(μS cm1)** | **pH** | **Number of OTUs** | **Chao 1 richness** |
| --- | --- | --- | --- | --- | --- | --- | --- | --- |
| SLT | Salt Pond | MIS | 78°00'0.96"  164°00'32.7" | 14 Jan. 2011 | 51400 | 9.8 | 59 | 175.25 |
| FRE | Fresh Pond | MIS | 78°00'0.93"  164°00'32.6" | 14 Jan. 2011 | 595 | 9.5 | 54 | 90.1 |
| ORG | Orange Pond | MIS | 78°00'0.82"  165°00'33.40" | 14 Jan. 2011 | 2102 | 10.1 | 69 | 115.5 |
| DIS | Pond half way between Brown Peninsula and Black Island | MIS | 78º07'38.7"  165º48'50.0" | 14 Jan. 2011 | 2657 | 9.4 | 57 | 74.8 |
| HTP2 | Hut Point Pond 2 | Hut Point, RI | 77º 50'41.8"  166º 38'36.8" | 21 Jan. 2012 | 2763 | 9.5 | 48 | 61.3 |
| HTP3 | Hut Point Pond 3 | Hut Point, RI | 77º 50'41.4"  166º 38'35.5" | 21 Jan. 2012 | 1779 | 9.7 | 35 | 38.0 |
| OBH | Observation Hill Pond | Cape Armitage, RI | 77º 51'20.9"  166º 41'25.7" | 21 Jan. 2012 | 541 | 9.9 | 50 | 92.9 |
| SKU | Skua Pond | Cape Evans, RI | 77º 38'07  166º25 38.4 | 16 Jan. 2011 | 1026 | 9.5 | 101 | 128.8 |
| COA | Coast Pond | Cape Royds, RI | 77º 32'35.8"  166º 08'55.1" | 6 Jan.2011 | 789 | 10.0 | 84 | 151.6 |

**Table S2. continued**

Location, date of collection, latitude-longitude and properties of cyanobacteria-base microbial mats and properties such as conductivity, temperature and pH. Legend: *unofficial names

| **Sample name** | **Site*** | **Location** | **Latitude**  **longitude** | **Date** | **Conductivity**  **(μS cm1)** | **pH** | **Number of OTUs** | **Chao 1 richness** |
| --- | --- | --- | --- | --- | --- | --- | --- | --- |
| BLU | Blue Lake | Cape Royds, RI | 77º 32'41.6"  166º 10'55.7" | 7 Jan.2011 | 129.03 | 10.2 | 59 | 109 |
| CLR | Clear Pond | Cape Royds, RI | 77º 32'28.5"  166º 09'23.5" | 7 Jan.2011 | 546.33 | 10.1 | 102 | 151.3 |
| BRT | Bart Pond | Cape Royds, RI | 77º 32'57.5"  166º 69'52.3" | 6 Jan.2011 | 56633.3 | 9.2 | 32 | 36.7 |
| SHL | Shacketon Pond | Cape Royds RI | 77º 32'20.5"  166º 10'06.9" | 5 Jan.2011 | 1117.67 | 9.7 | 80 | 117 |
| ERNST | Ernest Pond | Cape Royds, RI | 77º 32'16.9"  166º 10'01.8" | 5 Jan.2011 | 2423.33 | 9.6 | 100 | 125.1 |

**Table S3**: Highest uncultured and cultured BLAST similarity match of the 10 most abundant cyanobacterial 16S rRNA genotypes in the historic and modern Antarctic cyanobacterial mat communities.

| **16S rRNA genotype** | **%** | **accession number** | **highest uncultured BLAST match** | **%** | **accession number** | **highest BLAST match** |
| --- | --- | --- | --- | --- | --- | --- |
| OTU1 | 100 | KU230335 | Uncultured Antarctic cyanobacterium clone HL820 16S ribosomal RNA gene | 100 | AY493590. | Leptolyngbya antarctica ANT.BFI.1 |
| OTU2 | 100 | KM112130 | Uncultured cyanobacterium clone LJ6_294 | 100 | KU219691 | Microcoleus sp. P1 16S ribosomal |
| OTU3 | 100 | AY541567 | Uncultured Antarctic cyanobacterium clone FreP17 | 99 | AY493607 | Leptolyngbya antarctica ANT.L18.1 |
| OTU4 | 100 | KM112108 | Uncultured cyanobacterium clone LH12_01 | 100 | DQ493873 | Phormidium autumnale Arct-Ph5 |
| OTU5 | 99 | HG932422 | Uncultured cyanobacterium partial 16S rRNA gene, isolate BI02, clone 97BI02D01b | 99 | AY493588 | Leptolyngbya antarctica ANT.LAC.1 |
| OTU6 | 100 | KP190129 | Uncultured cyanobacterium clone BTRA-39 | 99 | KU219729.1 | Phormidesmis sp. HOR_11_6 |
| OTU7 | 99 | KF029608 | Uncultured cyanobacterium clone 20.1.11-009_Isolat_1 | 99 | KT347094 | Phormidium pseudopriestleyi FRX01 1 |
| OTU8 | 100 | KU230341 | Uncultured Antarctic cyanobacterium clone HL172 1 | 100 | LT600732.1 | Pseudanabaena sp. RL-08-7 |
| OTU9 | 100 | JX948577 | Uncultured bacterium clone 4I.2.31 | 98 | KU161657 | Leptolyngbyaceae cyanobacterium EY08-AM1 clone 10B |
| OTU10 | 100 | KC895987 | Uncultured cyanobacterium clone OABF_3 1 | 99 | AY493587 | Pseudophormidium sp. ANT.LPE.3 |

**Table S4**. Cyanobacterial 16S rRNA genotypes that contribute up to 25% of cumulative dissimilarity based on SIMPER analysis; OTUs only present in modern samples are marked in bold. Any OTUS present in historic samples only contributed < 25%.

| **Taxon** | **Average dissimilarity** | **Contribution**  **%** | **Cumulative**  **%** | **Mean 1** | **Mean 2** |
| --- | --- | --- | --- | --- | --- |
| denovo4878 | 0.7887 | 1.13 | 1.13 | 2.1 | 3.14 |
| denovo4756 | 0.7871 | 1.128 | 2.258 | 1.39 | 1.78 |
| **denovo1261** | **0.7731** | **1.108** | **3.366** | **0.188** | **1.75** |
| denovo10 | 0.7021 | 1.006 | 4.372 | 2.46 | 3.07 |
| denovo5012 | 0.6852 | 0.9818 | 5.353 | 2.77 | 2.36 |
| denovo4290 | 0.6764 | 0.9692 | 6.323 | 0.837 | 1.78 |
| denovo3486 | 0.6655 | 0.9536 | 7.276 | 3.28 | 2.65 |
| denovo131 | 0.6599 | 0.9456 | 8.222 | 2.84 | 2.55 |
| denovo1370 | 0.6476 | 0.928 | 9.15 | 1.56 | 1.46 |
| denovo1987 | 0.5952 | 0.8528 | 10 | 1.38 | 0.637 |
| denovo13 | 0.5883 | 0.843 | 10.85 | 1.04 | 1.34 |
| denovo619 | 0.5321 | 0.7624 | 11.61 | 3.07 | 2.19 |
| denovo4212 | 0.5312 | 0.7612 | 12.37 | 2.95 | 2.78 |
| denovo3348 | 0.4941 | 0.7079 | 13.08 | 1.28 | 1.56 |
| denovo1895 | 0.4669 | 0.6691 | 13.75 | 1.06 | 0.112 |
| denovo1042 | 0.465 | 0.6664 | 14.41 | 0.143 | 0.975 |
| denovo698 | 0.4542 | 0.6508 | 15.06 | 0.946 | 0.0714 |
| denovo4337 | 0.4508 | 0.646 | 15.71 | 0.955 | 0.0714 |
| denovo5213 | 0.4484 | 0.6426 | 16.35 | 0 | 0.983 |
| denovo2516 | 0.4448 | 0.6373 | 16.99 | 1.15 | 0.398 |
| denovo4343 | 0.4405 | 0.6312 | 17.62 | 1.36 | 1.2 |
| denovo766 | 0.4357 | 0.6243 | 18.24 | 0.989 | 0.179 |
| denovo4682 | 0.4314 | 0.6181 | 18.86 | 1.53 | 0.901 |
| denovo4163 | 0.4219 | 0.6046 | 19.47 | 0.17 | 0.755 |
| denovo1938 | 0.4097 | 0.5871 | 20.05 | 0.313 | 0.91 |
| denovo5038 | 0.4056 | 0.5811 | 20.64 | 0.912 | 0.237 |
| denovo778 | 0.3871 | 0.5547 | 21.19 | 0.903 | 0.874 |
| denovo667 | 0.3851 | 0.5518 | 21.74 | 0.849 | 0.143 |
| denovo1989 | 0.3813 | 0.5464 | 22.29 | 0.873 | 0.351 |
| denovo3244 | 0.3713 | 0.532 | 22.82 | 0.419 | 0.703 |
| denovo957 | 0.3705 | 0.5309 | 23.35 | 0.843 | 0.53 |
| denovo1569 | 0.3607 | 0.5168 | 23.87 | 0.716 | 0.927 |
| denovo2101 | 0.36 | 0.5158 | 24.38 | 0.786 | 0.13 |
| denovo4573 | 0.3558 | 0.5098 | 24.89 | 0.815 | 0.525 |
| denovo2803 | 0.353 | 0.5058 | 25.4 | 0.809 | 0.241 |

**Figure S1:** A) Geographic location of Ross Island (RI) and McMurdo Ice Shelf (MIS) in Antarctica. B) Locations of the herbarium cyanobacteria specimens collected during Captain Scott’s “Discovery” National Antarctic Expedition at their winter quarters on Ross Island and eskers on the McMurdo Ice Shelf halfway between Black Island (BI) and Brown Peninsula (BP) in 1902-03. Modern Antarctic cyanobacterial communities were collected on Ross Island (Cape Royds and Evans as well as Armitage and Hut Point adjacent to location of former winter quarters) and on the McMurdo Ice Shelf including halfway between Black Island and Brown Peninsula and near Brown Peninsula in 2011-2012.

**
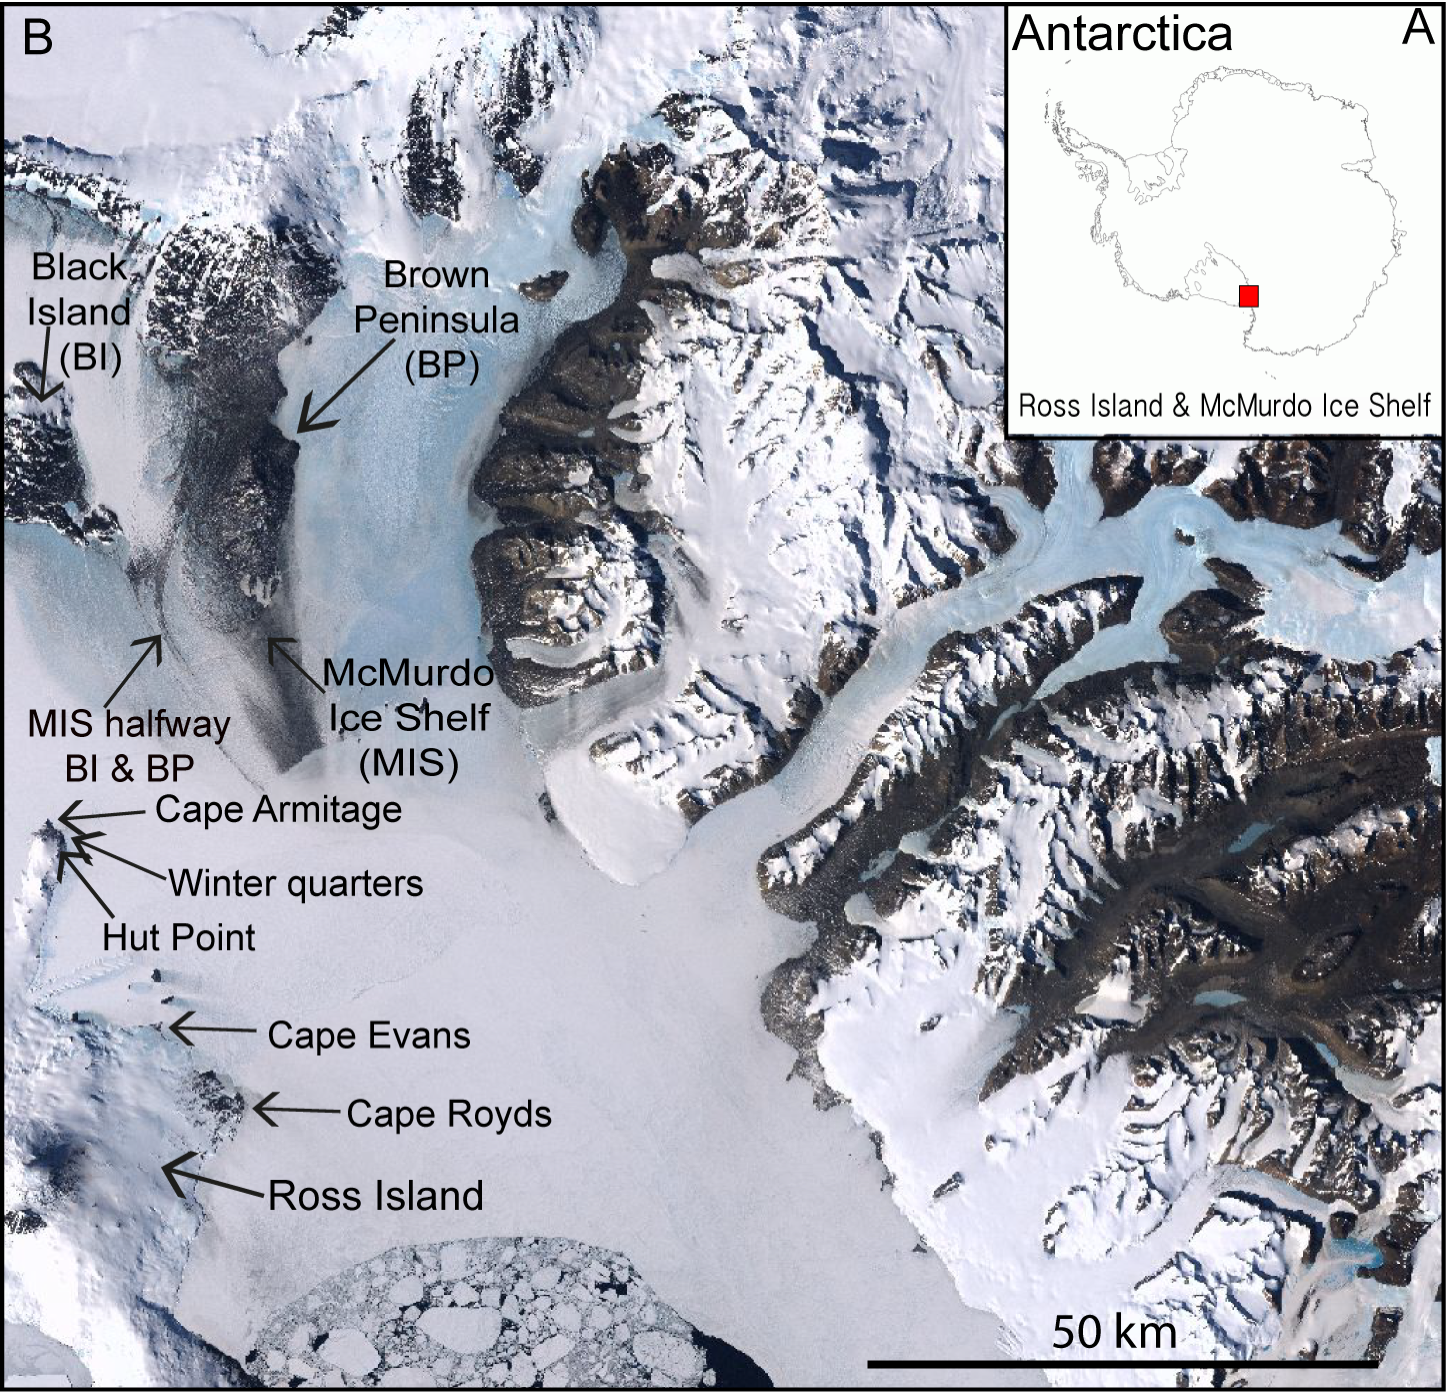
**

**Figure S2.**

Number of sequences of the 10 most abundant OTUs (99% clustering) in the historic and modern Antarctic cyanobacteria mat community samples.

**Figure S3.** Phylogentic analysis of representative sequences from the 10 most abundant cyanobacterial 16S rRNA genotypes (pink) as well as representative sequences from the OTUS that were identified either only in the historic (red) or modern cyanobacteria communities (blue) from Antarctic microbial mat samples. Bootstrap support for nodes is shown for values greater than 50%. The 16S rRNA gene sequences of *Gloeobacter violaceus* PCC 7421 (BA000045) was used as an outgroup.

Supplementary Figure S2 continued

Supplementary Figure S2 continued
